# Supplementary material for: The Impact of SARS-CoV-2 Multiple Spike Protein Mutations on COVID-19 Outcomes
Source: Research Square preprint supplement (doi:10.21203/rs.3.rs-700897/v1), 2021-07-26
Supplement: Supplementary file 1 [file 80e6c791453ab49b6168ef7c.xlsx]

## Sheet: Table
Table 3. Amino acid mutations observed in SARS-CoV-2 genomes collected from patients with COVID-19 in Yogyakarta and Central Java provinces.
	5'UTR				NSP1-ORF1AB	NSP2-ORF1AB									NSP3-ORF1AB																												NSP4-ORF1AB						NSP5A-ORF1AB
VIRUS ID	3	14	73	81	117	128	129	167	205	235	247	256	321	456	53	54	58	99	101	149	196	231	299	325	469	679	822	945	1022	1179	1197	1198	1230	1244	1311	1354	1396	1495	1642	1665	1680	1770	117	143	231	361	383	386	12
NC_045512.2 WUHAN	G	L	P	R	A	Y	P	E	A	G	A	T	Q	K	F	A	A	A	H	A	M	A	V	V	V	P	P	K	T	A	S	T	S	L	A	F	S	S	A	P	N	V	D	T	A	A	I	S	K
EPI_ISL_576130	G	L	P	C	A	Y	P	E	A	G	A	I	K	K	F	A	A	A	H	A	M	A	V	V	V	P	L	K	T	A	S	T	S	L	A	F	S	S	A	P	N	V	D	T	A	A	I	S	K
_EPI_ISL_902749	G	L	S	C	A	Y	P	E	A	G	A	T	Q	K	F	A	T	A	H	A	M	A	V	F	V	P	P	K	T	A	S	T	S	F	A	F	S	S	A	P	N	V	D	T	A	A	I	S	K
_EPI_ISL_911709	G	L	P	C	A	Y	P	E	A	G	A	T	Q	K	F	A	A	A	H	A	M	A	V	V	V	P	L	K	T	A	T	T	S	L	A	F	S	S	A	P	N	V	D	T	A	A	I	S	K
EPI_ISL_885142	G	L	P	C	A	Y	P	E	A	G	A	T	Q	K	F	A	A	S	H	A	M	V	V	V	V	P	P	K	T	A	S	T	S	L	A	F	S	S	A	P	N	V	D	T	A	A	I	S	K
EPI_ISL_862040	G	L	P	C	A	Y	P	E	A	G	A	T	Q	K	F	A	A	A	H	A	M	A	V	V	V	P	P	N	T	A	S	T	S	L	A	F	L	S	A	P	N	V	D	T	A	A	I	S	K
_EPI_ISL_877129	G	L	P	C	A	Y	P	E	A	G	A	T	Q	K	F	A	A	A	H	A	L	A	V	V	V	P	P	K	T	A	S	T	S	L	A	F	S	S	A	P	N	V	D	T	A	A	V	S	K
_EPI_ISL_877128	G	L	P	C	A	Y	P	E	A	G	A	T	Q	K	F	A	A	A	H	A	L	A	V	V	V	P	P	K	T	A	S	T	S	L	A	F	S	S	A	P	N	V	D	T	A	A	V	S	K
EPI_ISL_862041	G	L	P	C	A	Y	P	E	A	G	A	T	Q	K	F	A	A	A	H	A	M	A	V	V	V	P	P	K	T	A	S	T	S	L	A	F	S	S	A	P	N	F	D	T	A	A	I	S	K
_EPI_ISL_891151	G	L	P	C	V	Y	P	E	A	G	A	T	Q	K	F	A	A	A	Y	A	M	A	V	V	V	P	P	K	T	A	S	T	S	L	A	F	S	S	A	P	N	V	D	T	A	A	I	S	K
_EPI_ISL_905731	G	L	P	C	A	Y	P	E	A	G	A	T	Q	K	F	A	T	A	H	A	M	A	V	F	V	P	P	K	T	A	S	T	S	F	A	F	S	S	A	P	N	V	D	T	A	A	I	S	K
EPI_ISL_576383	G	L	P	C	A	Y	P	E	V	G	A	T	Q	K	F	A	A	A	H	A	M	A	V	V	V	P	P	K	T	A	S	T	S	L	A	F	S	S	A	P	N	V	D	T	A	A	I	S	K
EPI_ISL_872190	G	L	P	C	A	Y	P	E	A	G	A	T	Q	K	L	A	A	A	H	V	M	A	V	V	V	P	L	K	T	A	S	T	S	L	A	F	S	S	A	P	N	V	D	T	A	A	I	S	K
EPI_ISL_872189	G	F	P	C	A	Y	P	E	A	G	A	T	Q	K	F	A	A	A	H	A	M	A	V	V	V	P	P	K	T	A	S	T	S	L	V	F	S	S	A	P	N	V	D	I	A	A	I	S	K
EPI_ISL_872188	G	L	P	C	A	Y	P	E	A	G	A	T	Q	K	F	A	A	A	H	A	M	A	V	V	M	P	P	K	T	A	S	T	S	L	A	F	S	S	A	P	S	V	D	T	A	A	I	S	K
EPI_ISL_575331	G	L	P	C	A	Y	P	E	A	G	A	T	Q	K	F	A	A	A	H	A	M	A	V	V	V	P	L	K	I	A	S	T	S	L	A	F	S	S	A	P	N	V	D	T	A	A	I	S	K
EPI_ISL_862039	G	L	P	C	A	Y	P	E	A	G	A	T	Q	K	F	A	A	S	H	A	M	V	V	V	V	P	P	K	T	A	S	T	S	L	A	F	S	S	A	P	N	V	D	T	A	A	I	S	K
_EPI_ISL_902737	G	L	P	C	A	Y	P	E	A	G	A	T	Q	K	F	A	T	A	H	A	M	A	V	F	V	P	P	K	T	A	S	T	S	F	A	F	S	S	A	P	N	V	D	T	A	A	I	S	K
_EPI_ISL_911707	G	L	P	C	A	Y	P	E	A	G	A	T	Q	K	F	A	A	A	H	A	M	A	V	V	V	P	L	K	T	A	T	T	S	L	A	F	S	S	A	P	N	V	D	T	A	A	I	S	K
_EPI_ISL_877131	G	L	P	C	A	Y	P	E	A	G	A	T	Q	K	F	A	A	A	H	A	L	A	V	V	V	P	P	K	T	A	S	T	S	L	A	F	S	S	A	P	N	V	D	T	A	A	V	S	K
_EPI_ISL_890185	G	L	P	C	A	H	P	E	A	G	A	T	Q	K	F	A	A	A	H	A	M	A	V	V	V	P	P	K	T	A	S	T	S	L	A	F	S	S	A	P	N	V	D	T	A	A	I	S	K
_EPI_ISL_906050	G	L	P	C	A	Y	P	E	A	G	A	T	Q	K	F	A	A	A	H	A	M	A	V	V	V	P	P	K	T	A	S	T	S	L	A	F	S	S	A	P	N	V	D	T	A	A	I	N	K
EPI_ISL_576116	G	L	P	C	A	Y	P	E	A	G	A	I	Q	K	F	A	A	A	H	A	M	A	V	V	V	P	L	K	T	A	S	T	S	L	A	F	S	S	A	P	N	V	D	T	A	A	I	S	R
_EPI_ISL_877130	G	L	P	C	A	Y	P	E	A	G	A	T	Q	K	F	A	A	A	H	A	L	A	V	V	V	P	P	K	T	A	S	T	S	L	A	F	S	S	A	P	N	V	D	T	A	A	V	S	K
_EPI_ISL_877126	G	L	P	C	A	Y	P	E	A	G	A	T	Q	K	F	A	A	A	H	A	L	A	V	V	V	P	P	K	T	A	S	T	S	L	A	F	S	S	A	P	N	V	D	T	A	A	V	S	K
EPI_ISL_632936	G	L	P	C	A	Y	P	E	A	G	A	T	Q	K	F	A	A	A	H	A	M	A	V	V	V	P	L	K	T	V	S	T	S	L	A	C	S	S	A	L	N	V	D	T	A	A	I	S	K
_EPI_ISL_985398	G	L	P	C	A	Y	P	E	A	S	A	T	Q	K	F	A	A	A	H	A	M	A	V	V	V	P	L	K	T	A	S	T	S	L	A	F	S	S	A	P	N	V	D	T	A	A	I	S	K
_EPI_ISL_906052	G	L	P	C	A	Y	P	E	A	G	A	T	Q	K	F	A	A	A	H	A	M	A	V	V	V	P	P	K	T	A	S	T	S	L	A	F	S	S	A	P	N	V	D	T	A	A	I	N	K
_EPI_ISL_890187	G	L	P	C	A	Y	P	E	A	G	A	T	Q	K	F	V	A	A	H	A	M	A	V	V	V	P	L	K	T	A	S	T	S	L	A	F	S	S	A	P	N	V	D	T	A	A	I	S	K
_EPI_ISL_890186	G	L	P	C	A	Y	P	E	A	G	A	T	Q	K	F	V	A	A	H	A	M	A	V	V	V	P	L	K	T	A	S	T	S	L	A	F	S	S	A	P	N	V	D	T	A	A	I	S	K
EPI_ISL_632937	G	L	P	C	A	Y	P	E	A	G	A	T	Q	K	F	A	A	A	H	A	M	A	V	V	V	P	P	K	T	A	S	T	S	L	A	F	S	S	A	P	N	V	D	T	A	A	I	S	K
EPI_ISL_576115	G	L	P	C	A	Y	P	E	A	G	V	T	Q	K	F	A	A	A	H	A	M	A	V	V	V	P	L	K	T	A	S	T	S	L	A	F	S	S	A	P	N	V	D	T	A	A	I	S	R
_EPI_ISL_877127	G	L	P	C	A	Y	P	E	A	G	A	T	Q	K	F	A	A	A	H	A	L	A	V	V	V	P	P	K	T	A	S	T	S	L	A	F	S	S	A	P	N	V	D	T	A	A	V	S	K
_EPI_ISL_516800	G	L	P	C	A	Y	P	E	A	G	A	T	Q	K	F	A	A	A	H	A	M	A	V	V	V	P	L	K	T	A	S	T	S	L	A	F	S	S	A	P	N	V	D	T	A	A	I	S	K
EPI_ISL_1005697	G	L	P	C	A	Y	P	E	A	G	A	T	Q	K	F	V	A	A	H	A	M	A	V	V	V	P	L	K	T	A	S	T	S	L	A	F	S	S	A	P	N	V	D	T	A	A	I	S	K
EPI_ISL_576113	G	L	P	C	A	Y	P	E	A	G	V	T	Q	K	F	A	A	A	H	A	M	A	V	V	V	P	L	K	T	A	S	T	S	L	A	F	S	S	A	P	N	V	D	T	A	A	I	S	R
EPI_ISL_1005696	G	L	P	C	A	Y	P	E	A	G	A	T	Q	K	F	A	A	A	H	A	M	A	V	V	V	P	L	K	T	A	S	T	S	L	A	F	S	S	A	P	N	V	D	T	A	A	I	S	K
EPI_ISL_1005698	G	L	P	C	A	Y	P	E	A	G	A	T	Q	R	F	A	A	A	H	A	M	A	V	V	V	P	L	K	T	A	S	T	S	L	A	F	S	S	A	P	N	V	D	T	A	A	I	S	K
EPI_ISL_985397	G	L	P	C	A	Y	S	E	A	G	A	T	Q	K	F	A	A	A	H	A	M	A	V	V	V	P	L	K	T	A	S	T	S	L	A	F	S	S	A	P	N	V	D	T	A	A	I	S	K
EPI_ISL_985396	G	L	P	C	A	Y	P	D	A	G	A	T	Q	K	F	A	A	A	H	A	M	A	V	V	V	P	L	K	T	A	S	T	F	L	A	F	S	F	V	P	N	V	N	T	A	V	I	S	K
EPI_ISL_525492	G	L	P	C	A	Y	P	E	A	G	A	T	Q	K	F	A	A	A	H	A	M	A	V	V	V	P	L	K	T	A	S	T	S	L	A	F	S	S	A	P	N	V	D	T	A	A	I	S	K
EPI_ISL_576145	G	L	P	C	A	Y	P	E	A	G	A	T	Q	K	F	A	A	A	H	A	M	A	V	V	V	P	P	K	T	A	S	T	S	L	A	F	S	S	A	P	N	V	D	T	A	A	I	S	K
EPI_ISL_906051	G	L	P	C	A	Y	P	E	A	G	A	T	Q	K	F	A	A	A	H	A	M	A	V	V	V	P	P	K	T	A	S	T	S	L	A	F	S	S	A	P	N	V	D	T	A	A	I	N	K
EPI_ISL_610161	G	L	P	C	A	Y	P	E	A	G	A	T	Q	K	F	A	A	A	H	A	M	A	V	V	V	P	L	K	T	A	S	T	S	L	A	F	S	S	A	P	N	V	D	T	A	A	I	S	R
EPI_ISL_516806	G	L	P	R	A	Y	P	E	A	G	A	T	Q	K	F	A	A	A	H	A	M	A	V	V	V	P	P	K	T	A	S	T	S	L	A	F	S	S	A	P	N	V	D	T	A	A	I	S	K
EPI_ISL_576128	G	L	P	C	A	Y	P	E	A	G	A	I	K	K	F	A	A	A	H	A	M	A	V	V	V	P	L	K	T	A	S	T	S	L	A	F	S	S	A	P	N	V	D	T	A	A	I	S	K
EPI_ISL_576114	C	L	P	C	A	Y	P	E	A	G	A	T	Q	K	F	A	A	A	H	A	M	A	A	V	V	P	L	K	T	A	S	T	S	L	A	F	S	S	A	P	N	V	D	T	V	A	I	S	K
EPI_ISL_610162	G	L	P	R	A	Y	P	E	A	G	A	T	Q	K	F	A	A	A	H	A	M	A	V	V	V	P	P	K	T	A	S	K	S	L	A	F	S	S	A	P	N	V	D	T	A	A	I	S	K
EPI_ISL_516829	G	L	P	C	A	Y	P	E	A	G	A	T	Q	K	F	A	A	A	H	A	M	A	V	V	V	S	P	K	T	A	S	T	S	L	A	F	S	S	A	P	N	V	D	T	A	A	I	S	K
EPI_ISL_1005695	G	L	P	C	A	Y	P	E	A	G	A	T	Q	K	F	A	A	A	H	A	M	A	V	V	V	P	P	K	T	A	S	T	S	L	A	F	S	S	A	P	N	V	D	T	A	A	I	S	K
[truncated: 122 more columns]
